# Supplementary material for: Species Identification and Genetic Diversity Analysis of Medicinal Plants Aconitum pendulum Busch and Aconitum flavum Hand.-Mazz
Source: MDPI journal article supplement (doi:10.3390/plants13060885), 2024-03-19
Supplement: s1 [file s1]

# Supplementary Material

Jing Sun <sup>1,2</sup>, Qing Sun <sup>1,2</sup>, Xin Li <sup>1,2</sup>, Wenjing Li <sup>3</sup>, Yi Li <sup>1</sup>, Yubi Zhou <sup>1</sup> and Yanping Hu <sup>1,\*</sup>

<sup>1</sup> Qinghai Provincial Key Laboratory of Qinghai-Tibet Plateau Biological Resources, Northwest Institute of Plateau Biology, Chinese Academy of Sciences, Xining 810008, China; sunjing21@mails.ucas.ac.cn (J.S.); sunqing22@mails.ucas.ac.cn (Q.S.); lixin2311@mails.ucas.ac.cn (X.L.); liyi@nwipb.cas.cn (Y.L.); ybzhou@nwipb.cas.cn (Y.Z.)

<sup>2</sup> University of Chinese Academy of Sciences, Beijing 100049, China

<sup>3</sup> Scientific Research and Popularization Base of Qinghai-Tibet Plateau Biology, Qinghai Provincial Key Laboratory of Animal Ecological Genomics, Xining 810008, China; wjli@nwipb.cas.cn

\* Correspondence: yphu@nwipb.cas.cn

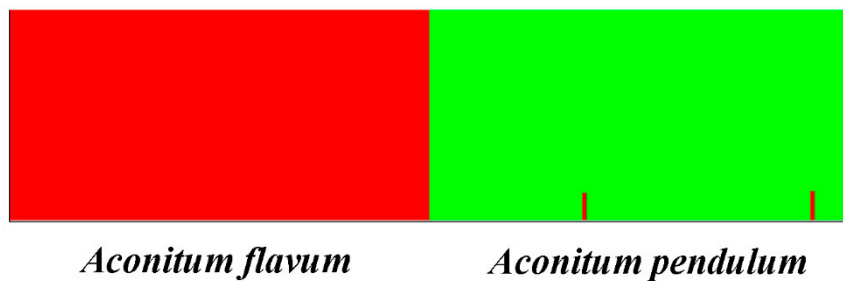

Figure S1. Results of BAPS analysis for two species of *Aconitum*.

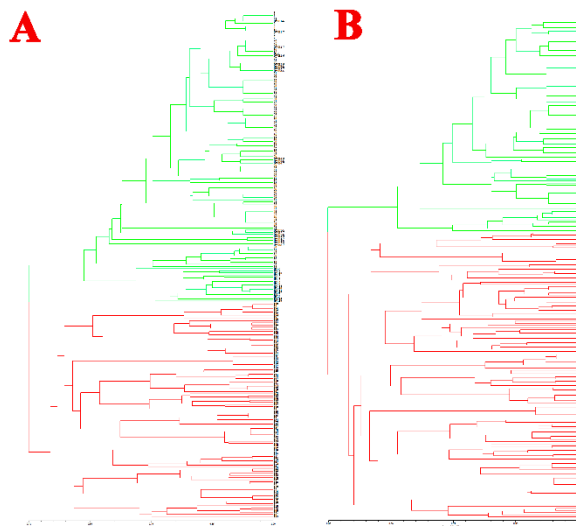

Figure S2. UPGMA clustering on verification of blind individuals (UBC808 and UBC853): (A) blind individuals from DWB and BM; (B) blind individuals from GQ and SL. Green represents *A. flavum* individuals; red represents *A. pendulum* individuals.

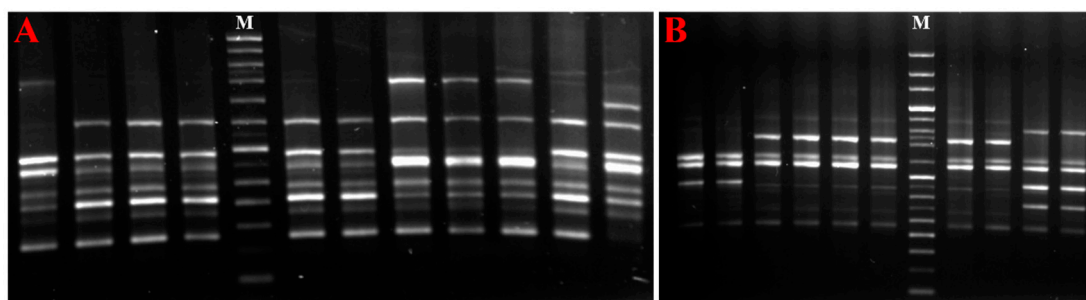

**Figure S3.** ISSR profiles of *A. flavum* and *A. pendulum* generated with primer UBC853: (A) DWB population; (B) QHL population; M = 100 bp + 200 bp TaKaRa DNA Ladder.

**Table S1.** Summary of banding profile and polymorphism revealed by 11 ISSR primers.

| Primer ID | Primer sequence (5'-3')    | TM (°C) | <i>A. flavum</i> |       |            |               | <i>A. pendulum</i> |       |            |               |
|-----------|----------------------------|---------|------------------|-------|------------|---------------|--------------------|-------|------------|---------------|
|           |                            |         | TNB              | NPB   | PPB (%)    | Size (bp)     | TNB                | NPB   | PPB (%)    | Size (bp)     |
| UBC807    | AGAGAG<br>AGAGAG<br>AGAGT  | 51.8    | 14               | 13    | 92.8<br>6  | 350-<br>1,200 | 17                 | 14    | 82.3<br>5  | 300-<br>1,200 |
| UBC808    | AGAGAG<br>AGAGAG<br>AGAGC  | 59.6    | 17               | 16    | 94.1<br>2  | 300-<br>1,700 | 19                 | 17    | 89.4<br>7  | 300-<br>1,700 |
| UBC811    | GAGAGA<br>GAGAGA<br>GAGAC  | 57.4    | 14               | 11    | 78.5<br>7  | 300-<br>1,300 | 18                 | 15    | 83.3<br>3  | 300-<br>1,300 |
| UBC812    | GAGAGA<br>GAGAGA<br>GAGAA  | 52      | 16               | 14    | 87.5<br>0  | 400-<br>1,800 | 17                 | 15    | 88.2<br>4  | 400-<br>1,800 |
| UBC824    | TCTCTCT<br>CTCTCTC<br>TCG  | 52      | 18               | 18    | 100.<br>00 | 400-<br>2,000 | 20                 | 20    | 100.<br>00 | 400-<br>2,000 |
| UBC825    | ACACAC<br>ACACAC<br>ACACT  | 53      | 22               | 22    | 100.<br>00 | 400-<br>2,000 | 20                 | 20    | 100.<br>00 | 400-<br>2,000 |
| UBC826    | ACACAC<br>ACACAC<br>ACACC  | 60      | 19               | 19    | 100.<br>00 | 300-<br>2,000 | 16                 | 16    | 100.<br>00 | 300-<br>2,000 |
| UBC846    | CACACA<br>CACACA<br>CACART | 52      | 19               | 19    | 100.<br>00 | 300-<br>1,800 | 20                 | 20    | 100.<br>00 | 450-<br>1,800 |
| UBC853    | TCTCTCT<br>CTCTCTC<br>TCRT | 50      | 13               | 12    | 92.3<br>1  | 550-<br>1,900 | 16                 | 16    | 100.<br>00 | 550-<br>1,900 |
| UBC887    | DVDTCT<br>CTCTCTC<br>TCTC  | 52      | 20               | 20    | 100.<br>00 | 350-<br>2,000 | 21                 | 21    | 100.<br>00 | 350-<br>2,000 |
| UBC890    | VHVG TG<br>TGTGTGT<br>GTGT | 56      | 21               | 21    | 100.<br>00 | 350-<br>2,000 | 19                 | 18    | 94.7<br>4  | 350-<br>2,000 |
| Total     | -                          | -       | 193              | 185   | 95.8<br>5  | 300-<br>2,000 | 203                | 192   | 94.5<br>8  | 300-<br>2,000 |
| Means     | -                          | -       | 17.55            | 16.82 | 95.8<br>5  | -             | 18.45              | 17.45 | 94.5<br>8  | -             |

D= (A, G, T); H= (A, C, T); R= (A, G); V= (A, C, G); Total Number of amplified Bands (TNB); Number of Polymorphic Bands (NPB), Percentage of Polymorphic Bands (PPB).

**Table S2.** Analysis of molecular variance (AMOVA) for ISSR variation surveyed in six populations of *A. flavum* (3) and *A. pendulum* (3)

| Source of variation | <i>d.f.</i> | SSD       | MSD     | Variation components | Total variation (%) | <i>P</i> value <sup>a</sup> |
|---------------------|-------------|-----------|---------|----------------------|---------------------|-----------------------------|
| <i>A. flavum</i>    |             |           |         |                      |                     |                             |
| Between populations | 2           | 596.373   | 298.187 | 9.59849              | 30.34               | <i>P</i> < 0.001            |
| Within populations  | 132         | 2,908.545 | 22.034  | 22.03443             | 69.66               | <i>P</i> < 0.001            |
| <i>A. pendulum</i>  |             |           |         |                      |                     |                             |
| Between populations | 2           | 865.13    | 432.565 | 15.17223             | 37.48               | <i>P</i> < 0.001            |
| Within populations  | 130         | 3,290.359 | 25.310  | 25.31045             | 62.52               | <i>P</i> < 0.001            |

*d.f.*: Degrees of freedom, SSD: sum of squares, MSD: mean squared deviation;

<sup>a</sup>: Significance tests after 1,000 permutations.

**Table S3.** Genetic differentiation among species calculated using different Bayesian approaches.

| Model                | populations differentiation ( $\theta_B$ ) |       |       |       |        | inbreeding coefficient ( <i>f</i> ) |       |       |       |        | DIC       |
|----------------------|--------------------------------------------|-------|-------|-------|--------|-------------------------------------|-------|-------|-------|--------|-----------|
|                      | Mean                                       | SD    | 2.50% | 50%   | 97.50% | Mean                                | SD    | 2.50% | 50%   | 97.50% |           |
| Full model           | 0.265                                      | 0.032 | 0.201 | 0.266 | 0.324  | 0.554                               | 0.272 | 0.050 | 0.567 | 0.976  | 2,517.43  |
| <i>f</i> = 0 model   | 0.207                                      | 0.019 | 0.173 | 0.206 | 0.248  | -                                   | -     | -     | -     | -      | 2,549.28  |
| $\theta_B$ = 0 model | -                                          | -     | -     | -     | -      | 0.981                               | 0.018 | 0.932 | 0.987 | 0.999  | 10,255.70 |
| <i>f</i> free model  | 0.288                                      | 0.027 | 0.237 | 0.288 | 0.341  | 0.493                               | 0.291 | 0.023 | 0.488 | 0.977  | 3,651.48  |

Hickory 1.1 Software uses the inbred coefficient (*f*), *f* = Full Model, 0 (assuming no inbreeding), free model and  $\theta_B$  = 0 model (assuming no population structure). The model calculates genetic differentiation and the genetic structure parameters of *A. flavum* and *A. pendulum*. Model selection was based on the Deviation Information Criterion (DIC). Models with smaller DICs are preferred.
